# Supplementary material for: Stochastic expression of invasion genes in Plasmodium falciparum schizonts
Source: PubMed Central journal article supplement (PMC9151791; doi:10.1038/s41467-022-30605-z), 2022-05-30
Supplement: 41467_2022_30605_MOESM2_ESM.pdf [file 41467_2022_30605_MOESM2_ESM.pdf]

## Description of Additional Supplementary Files

**File Name:** Supplementary Data 1

**Description:** Differentially expressed genes along the pseudotemporal progression

**File Name:** Supplementary Data 2

**Description:** MPM pathways enrichment for differentially expressed genes along the pseudotemporal progression

**File Name:** Supplementary Data 3

**Description:** Variability index score for SCTS 1,4,5,6 and 7

**File Name:** Supplementary Data 4

**Description:** Highly variable genes for non-isogenic schizonts

**File Name:** Supplementary Data 5

**Description:** Highly variable genes for isogenic schizonts

**File Name:** Supplementary Data 6

**Description:** qRT PCR Primer Sequences

**File Name:** Supplementary Data 7

**Description:** List of all 3459 SNPs

**File Name:** Supplementary Data 8

**Description:** Genes associated with SNPs in isogenic cells
