# Supplementary material for: Stochastic expression of invasion genes in Plasmodium falciparum schizonts
Source: Nat Commun. 2022 May 30;13:3004. doi: 10.1038/s41467-022-30605-z (PMC9151791; doi:10.1038/s41467-022-30605-z)
Supplement: Supplementary file 3 — Supplementary Data 1 [file 41467_2022_30605_MOESM3_ESM.xlsx]

## Sheet: Sheet1
DE geneID	p value adjusted
PF3D7_0310400	2.01536e-65
PF3D7_0207700	2.909e-65
PF3D7_0917900	1.14587e-64
PF3D7_1108600	2.29152e-61
PF3D7_1352500	2.49513e-59
PF3D7_1001600	1.68552e-54
PF3D7_1315600	3.3085e-51
PF3D7_1020900	1.22069e-50
PF3D7_0207600	2.4953e-46
PF3D7_1237700	1.27966e-45
PF3D7_0726000	1.63741e-45
PF3D7_0112700	1.70306e-42
PF3D7_0532000	4.19168e-42
PF3D7_1371300	1.59496e-40
PF3D7_0419400	2.27607e-40
PF3D7_0904700	1.45512e-39
PF3D7_1405600	4.59171e-38
PF3D7_0525800	2.64907e-37
PF3D7_0512600	3.93608e-37
PF3D7_1113300	4.45904e-37
PF3D7_0725600	1.50187e-36
PF3D7_0628300	4.05253e-36
PF3D7_0410000	4.98212e-36
PF3D7_0929400	7.93158e-36
PF3D7_1222300	4.77863e-35
PF3D7_1353600	3.12167e-34
PF3D7_0504900	7.66018e-34
PF3D7_0619400	9.76079e-34
PF3D7_1353900	1.46077e-33
PF3D7_0811600	4.31547e-33
PF3D7_1228600	1.37658e-31
PF3D7_1471200	1.76734e-31
PF3D7_1219100	5.96362e-31
PF3D7_0531600	1.0946e-30
PF3D7_1038000	1.11498e-30
PF3D7_0608800	1.77773e-30
PF3D7_0511800	3.17556e-30
PF3D7_1338100	4.94377e-30
PF3D7_1328100	5.36785e-30
PF3D7_0922200	5.38597e-30
PF3D7_0515700	5.91998e-30
PF3D7_1117100	6.27756e-30
PF3D7_0423700	1.80372e-29
PF3D7_1315300	3.66445e-28
PF3D7_0909600	3.99041e-28
PF3D7_1246400	4.21462e-28
PF3D7_0613400	5.11651e-28
PF3D7_1138000	7.36344e-28
PF3D7_1440100	1.47501e-27
PF3D7_0305600	1.58253e-27
PF3D7_1335400	7.86789e-27
PF3D7_1344200	1.00459e-26
PF3D7_0607700	1.01235e-26
PF3D7_1033900	1.12795e-26
PF3D7_1335300	3.11855e-26
PF3D7_1125000	5.29349e-26
PF3D7_0414900	3.66965e-25
PF3D7_1003600	4.90632e-25
PF3D7_1406800	2.45125e-24
PF3D7_1202200	2.87974e-24
PF3D7_1455300	3.13077e-24
PF3D7_1422500	3.95247e-24
PF3D7_1252100	1.08917e-23
PF3D7_0606700	2.73678e-23
PF3D7_1414000	2.87801e-23
PF3D7_0520900	4.92675e-23
PF3D7_1239800	5.1372e-23
PF3D7_1466300	8.65995e-23
PF3D7_1322200	9.56391e-23
PF3D7_1361100	1.42334e-22
PF3D7_0527000	2.20231e-22
PF3D7_1018200	6.89503e-22
PF3D7_1236100	1.50063e-21
PF3D7_1132800	3.71755e-21
PF3D7_1438900	4.05326e-21
PF3D7_1314500	4.60315e-21
PF3D7_0919900	6.66247e-21
PF3D7_1251200	8.47519e-21
PF3D7_1035100	9.55725e-21
PF3D7_1148620	4.67143e-20
PF3D7_1148640	6.83286e-20
PF3D7_0604100	7.03086e-20
PF3D7_0903300	1.20896e-19
PF3D7_1021900	1.45277e-19
PF3D7_1349500	2.90969e-19
PF3D7_1121600	3.91164e-19
PF3D7_0903600	6.45848e-19
PF3D7_0821000	9.75116e-19
PF3D7_1334600	1.01764e-18
PF3D7_1004200	7.87432e-18
PF3D7_1125700	8.04655e-18
PF3D7_1225800	9.51525e-18
PF3D7_0420300	1.04224e-17
PF3D7_1356100	1.4733e-17
PF3D7_0424100	1.96121e-17
PF3D7_1368100	6.35105e-17
PF3D7_0926400	6.44625e-17
PF3D7_0205800	7.65597e-17
PF3D7_0929300	1.59223e-16
PF3D7_1220900	1.93767e-16
PF3D7_1140400	3.21716e-16
PF3D7_1035500	6.61534e-16
PF3D7_0713700	1.00838e-15
PF3D7_0704100	1.0822e-15
PF3D7_0905400	1.56622e-15
PF3D7_1115600	1.76137e-15
PF3D7_0911100	2.26826e-15
PF3D7_0210600	3.80478e-15
PF3D7_0807800	3.97769e-15
PF3D7_1311400	4.18849e-15
PF3D7_1145100	5.94102e-15
PF3D7_0919200	6.89935e-15
PF3D7_0212600	1.11732e-14
PF3D7_0207100	2.0912e-14
PF3D7_1457000	2.10809e-14
PF3D7_0612200	2.33476e-14
PF3D7_0822900	2.73629e-14
PF3D7_0823800	2.88784e-14
PF3D7_0726700	4.1564e-14
PF3D7_1124100	6.74391e-14
PF3D7_1230700	8.82506e-14
PF3D7_0529400	1.45469e-13
PF3D7_0507100	1.6461e-13
PF3D7_1252400	2.61754e-13
PF3D7_1342600	3.28005e-13
PF3D7_0424300	3.50589e-13
PF3D7_0818200	6.18874e-13
PF3D7_1141800	8.49446e-13
PF3D7_0214600	1.06587e-12
PF3D7_0731600	1.40127e-12
PF3D7_0419600	1.66493e-12
PF3D7_1337800	1.71626e-12
PF3D7_0314000	2.05876e-12
PF3D7_0907400	2.54264e-12
PF3D7_0931200	2.65949e-12
PF3D7_0935000	2.8075e-12
PF3D7_1351700	2.84845e-12
PF3D7_1126300	4.61736e-12
PF3D7_0818500	4.66379e-12
PF3D7_1122500	5.10234e-12
PF3D7_1204300	6.32352e-12
PF3D7_1143100	6.64179e-12
PF3D7_0323500	6.81279e-12
PF3D7_0709100	7.14884e-12
PF3D7_0918000	7.28618e-12
PF3D7_0827500	1.13851e-11
PF3D7_1034900	1.76472e-11
PF3D7_0914400	2.08474e-11
PF3D7_1310700	2.62346e-11
PF3D7_1237900	3.79638e-11
PF3D7_0617900	3.88293e-11
PF3D7_0828800	4.19083e-11
PF3D7_0717300	5.6613e-11
PF3D7_0922600	5.91062e-11
PF3D7_0307500	6.86266e-11
PF3D7_1466100	8.12428e-11
PF3D7_0104200	1.22472e-10
PF3D7_0321900	1.29626e-10
PF3D7_1136900	1.41233e-10
PF3D7_0622900	1.58471e-10
PF3D7_1239200	2.23418e-10
PF3D7_0522600	2.37327e-10
PF3D7_1014100	2.39991e-10
PF3D7_1343000	2.54556e-10
PF3D7_1036000	2.62654e-10
PF3D7_0216800	2.66865e-10
PF3D7_1128900	3.1186e-10
PF3D7_0507400	3.52181e-10
PF3D7_1027300	4.11292e-10
PF3D7_0825200	4.71893e-10
PF3D7_1333300	4.93165e-10
PF3D7_1413700	5.26083e-10
PF3D7_0816200	5.35592e-10
PF3D7_1138700	5.69399e-10
PF3D7_1309100	5.90475e-10
PF3D7_1035400	1.06007e-09
PF3D7_1138500	1.20882e-09
PF3D7_0501500	1.28745e-09
PF3D7_1008000	1.42219e-09
PF3D7_1218000	1.44618e-09
PF3D7_1427900	1.67002e-09
PF3D7_1436300	1.68403e-09
PF3D7_1220300	1.90707e-09
PF3D7_1331600	2.28034e-09
PF3D7_1131100	2.66648e-09
PF3D7_0402200	2.71291e-09
PF3D7_1320600	3.04748e-09
PF3D7_1134100	3.09735e-09
PF3D7_0206900	3.49392e-09
PF3D7_1455100	4.63257e-09
PF3D7_1149200	5.07528e-09
PF3D7_1105100	5.18269e-09
PF3D7_0514900	5.26015e-09
PF3D7_0102200	6.47058e-09
PF3D7_1309400	8.02573e-09
PF3D7_1238900	8.58605e-09
PF3D7_1413500	9.23709e-09
PF3D7_0625400	1.04284e-08
PF3D7_0730300	1.04483e-08
PF3D7_0104300	1.07439e-08
PF3D7_0717700	1.30296e-08
PF3D7_0731500	1.37141e-08
PF3D7_1471100	1.39735e-08
PF3D7_0831600	1.50325e-08
PF3D7_0407900	1.67589e-08
PF3D7_1026600	2.21068e-08
PF3D7_0818100	2.47241e-08
PF3D7_0624600	2.62687e-08
PF3D7_1125800	4.51729e-08
PF3D7_1401400	6.06978e-08
PF3D7_0806800	6.51911e-08
PF3D7_0924500	7.40654e-08
PF3D7_0730800	1.06659e-07
PF3D7_0210700	1.07942e-07
PF3D7_0808200	1.1322e-07
PF3D7_1426700	1.26704e-07
PF3D7_1409600	1.54377e-07
PF3D7_0316300	1.69243e-07
PF3D7_0313300	1.74224e-07
PF3D7_1036500	1.75941e-07
PF3D7_0216700	1.76143e-07
PF3D7_0424600	1.88185e-07
PF3D7_1118300	2.00088e-07
PF3D7_0220000	2.27036e-07
PF3D7_0530100	2.28744e-07
PF3D7_0208000	2.33017e-07
PF3D7_1420700	2.38885e-07
PF3D7_0507200	2.46647e-07
PF3D7_1320700	2.49592e-07
PF3D7_0415800	2.68452e-07
PF3D7_1318400	2.71733e-07
PF3D7_0424200	2.84058e-07
PF3D7_1460600	3.43395e-07
PF3D7_0507500	3.79458e-07
PF3D7_1119400	3.82418e-07
PF3D7_0915100	3.98677e-07
PF3D7_1471000	4.42488e-07
PF3D7_0204200	5.60229e-07
PF3D7_1440000	6.88516e-07
PF3D7_1449100	7.15551e-07
PF3D7_1468400	7.43132e-07
PF3D7_0913200	7.53602e-07
PF3D7_1019500	9.44928e-07
PF3D7_1404800	9.67163e-07
PF3D7_0418600	1.04429e-06
PF3D7_0623000	1.18625e-06
PF3D7_1135100	1.19427e-06
PF3D7_1371000	1.62982e-06
PF3D7_1313800	1.72037e-06
PF3D7_1424400	1.78502e-06
PF3D7_1460100	1.82797e-06
PF3D7_1142500	1.87181e-06
PF3D7_0820900	1.90745e-06
PF3D7_0206200	1.98066e-06
PF3D7_1365900	2.0199e-06
PF3D7_0308300	2.09949e-06
PF3D7_0414000	2.57085e-06
PF3D7_1116700	2.6286e-06
PF3D7_1016800	2.79174e-06
PF3D7_1116800	2.94358e-06
PF3D7_0919300	2.97038e-06
PF3D7_1456000	3.13242e-06
PF3D7_0723900	3.82935e-06
PF3D7_1306200	3.85986e-06
PF3D7_1133400	4.20591e-06
PF3D7_1346300	4.33614e-06
PF3D7_1127600	4.4224e-06
PF3D7_0629700	4.49351e-06
PF3D7_0413600	4.80087e-06
PF3D7_0624200	5.56743e-06
PF3D7_1440400	5.607e-06
PF3D7_1029900	5.72153e-06
PF3D7_0204100	6.1337e-06
PF3D7_0419300	6.36745e-06
PF3D7_0530900	6.38387e-06
PF3D7_1425700	6.43079e-06
PF3D7_0214700	6.62781e-06
PF3D7_1464400	6.82843e-06
PF3D7_1212600	6.97629e-06
PF3D7_0818600	6.98979e-06
PF3D7_0802100	6.99915e-06
PF3D7_0935800	7.64251e-06
PF3D7_0503400	7.7228e-06
PF3D7_1351400	7.93984e-06
PF3D7_1127900	8.1522e-06
PF3D7_0515400	8.78009e-06
PF3D7_0705500	1.16699e-05
PF3D7_1134300	1.2233e-05
PF3D7_1445000	1.34572e-05
PF3D7_0103400	1.5606e-05
PF3D7_0705100	1.69928e-05
PF3D7_0106000	1.71321e-05
PF3D7_0406100	1.80481e-05
PF3D7_0214800	1.81711e-05
PF3D7_1345900	1.81898e-05
PF3D7_0316900	2.28371e-05
PF3D7_0924000	2.30281e-05
PF3D7_1455500	2.40467e-05
PF3D7_0313800	2.7397e-05
PF3D7_1317300	2.88099e-05
PF3D7_0402100	3.04556e-05
PF3D7_0509100	3.17411e-05
PF3D7_0725400	3.27883e-05
PF3D7_0807500	3.35107e-05
PF3D7_0423500	3.39017e-05
PF3D7_1430900	3.92181e-05
PF3D7_1410400	5.05548e-05
PF3D7_0830500	5.124e-05
PF3D7_0318700	5.12801e-05
PF3D7_1340700	5.19896e-05
PF3D7_1423300	5.74821e-05
PF3D7_0922700	5.88494e-05
PF3D7_1243700	5.96212e-05
PF3D7_1010700	6.39014e-05
PF3D7_1407200	6.55583e-05
PF3D7_1411200	6.69387e-05
PF3D7_1404900	6.8052e-05
PF3D7_1015100	6.85158e-05
PF3D7_1433400	6.88018e-05
PF3D7_0320000	6.96707e-05
PF3D7_1115800	7.20833e-05
PF3D7_0504800	7.33952e-05
PF3D7_1427700	8.31325e-05
PF3D7_0219600	8.48065e-05
PF3D7_0413700	9.168e-05
PF3D7_0721200	9.17575e-05
PF3D7_1342000	0.00010274
PF3D7_1131800	0.000106353
PF3D7_1462800	0.000114882
PF3D7_0803500	0.000126635
PF3D7_0316000	0.000129166
PF3D7_1233800	0.000131044
PF3D7_1222700	0.000135129
PF3D7_1406200	0.000137049
PF3D7_1421000	0.000147862
PF3D7_0708700	0.000161096
PF3D7_1451200	0.000171411
PF3D7_1345500	0.000191733
PF3D7_0611100	0.000207349
PF3D7_0519600	0.000223236
PF3D7_0609000	0.000227011
PF3D7_0802200	0.000264961
PF3D7_0623800	0.000265172
PF3D7_1016000	0.000275907
PF3D7_1457400	0.00028671
PF3D7_0904800	0.00028845
PF3D7_1441300	0.000306647
PF3D7_1361700	0.000313915
PF3D7_1028200	0.000323552
PF3D7_1456700	0.000330491
PF3D7_1146600	0.000331777
PF3D7_1429600	0.000361526
PF3D7_1028700	0.000412843
PF3D7_0930200	0.000433691
PF3D7_1319400	0.000458198
PF3D7_0509800	0.000465036
PF3D7_0503200	0.00048165
PF3D7_1403100	0.000507784
PF3D7_1463000	0.000564672
PF3D7_0202500	0.000637223
PF3D7_1147600	0.000646548
PF3D7_0824700	0.000649181
PF3D7_1216400	0.000702314
PF3D7_1309120	0.000714329
PF3D7_0705300	0.000765478
PF3D7_0916300	0.000820634
PF3D7_1102800	0.000832749
PF3D7_1115400	0.000855436
PF3D7_0926900	0.000935161
PF3D7_1429800	0.000940441
PF3D7_0501100	0.0010057
PF3D7_1235600	0.00104065
PF3D7_1475000	0.00107445
PF3D7_0103500	0.00116
PF3D7_1142800	0.00116778
PF3D7_0410600	0.00120801
PF3D7_0503000	0.00125831
PF3D7_1119900	0.00128846
PF3D7_0813200	0.00140177
PF3D7_1402400	0.00141414
PF3D7_0727100	0.00142845
PF3D7_1104100	0.00148029
PF3D7_1138400	0.00155978
PF3D7_0914100	0.00161435
PF3D7_0707500	0.00163203
PF3D7_1433500	0.00165016
PF3D7_0418700	0.00179794
PF3D7_1252800	0.00195027
PF3D7_1005900	0.00226436
PF3D7_0626100	0.00226813
PF3D7_0203600	0.00235791
PF3D7_0615500	0.00236812
PF3D7_0211800	0.00237351
PF3D7_1447000	0.0024437
PF3D7_1143800	0.00252479
PF3D7_1371600	0.00259073
PF3D7_1211800	0.00265681
PF3D7_1321400	0.00291603
PF3D7_0525100	0.00310227
PF3D7_1107100	0.00321344
PF3D7_0507300	0.00335814
PF3D7_1208400	0.00360191
PF3D7_1035300	0.00375516
PF3D7_1035700	0.00375876
PF3D7_1139800	0.00381728
PF3D7_1347300	0.00392373
PF3D7_0508600	0.00392512
PF3D7_1348400	0.00393578
PF3D7_0319700	0.00402028
PF3D7_0810300	0.00409761
PF3D7_0924400	0.00432888
PF3D7_0927900	0.00457139
PF3D7_1443900	0.00483434
PF3D7_0731000	0.00484294
PF3D7_0302500	0.00489274
PF3D7_0301300	0.00492588
PF3D7_0627300	0.00512922
PF3D7_0107500	0.00520529
PF3D7_0811100	0.00551517
PF3D7_0629300	0.00558651
PF3D7_0915700	0.00560463
PF3D7_0417400	0.00572672
PF3D7_1227000	0.0058533
PF3D7_0408000	0.00592187
PF3D7_0934800	0.00610477
PF3D7_0526500	0.00636971
PF3D7_0501600	0.00689527
PF3D7_1440700	0.00693195
PF3D7_1123900	0.00706382
PF3D7_0113900	0.00715992
PF3D7_1117900	0.00765817
PF3D7_0814400	0.00776951
PF3D7_0508900	0.00787596
PF3D7_1208800	0.00814663
PF3D7_API04900.1	0.00825724
PF3D7_0506900	0.00831145
PF3D7_0806900	0.00831733
PF3D7_0303400	0.0091622
PF3D7_0707600	0.00944254
PF3D7_0605200	0.00946023
PF3D7_1339300	0.0094762
